# Supplementary material
Source: PubMed Central journal article supplement (PMC3308186)

Briançon et al. Supplemental Fig. 3

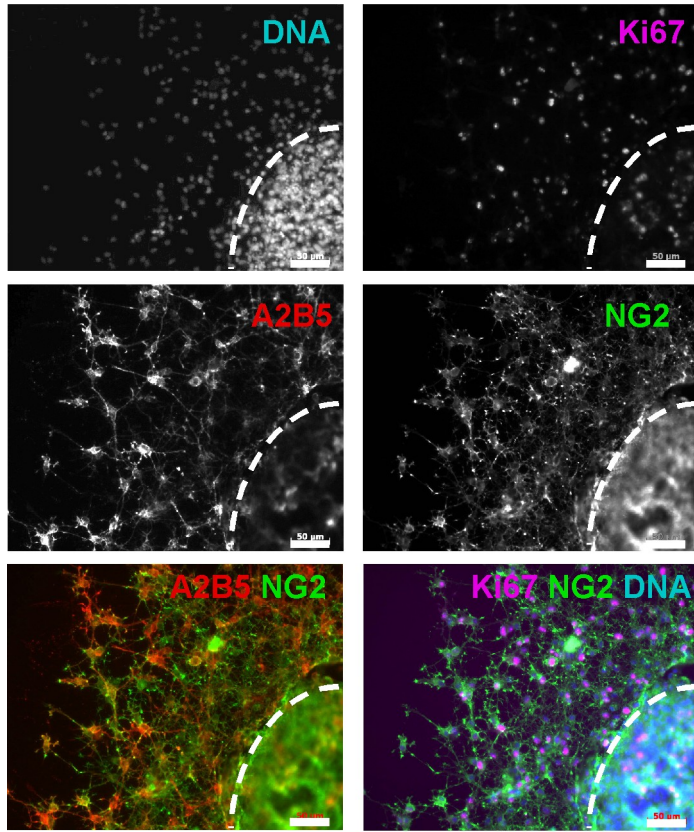

Supplement: halms567905-supplement_4.pdf [file halms567905-supplement_4.pdf]
